## Biophysical characterization of the SARS-CoV-2 E protein

### *Authors*

Aujan Mehregan (1), Sergio Pérez-Conesa (2), Yuxuan Zhuang (3), Ahmad Elbahnsi (2), Diletta Pasini (1), Erik Lindahl (2,3), Rebecca J Howard (3)\*, Chris Ulens (1)\*, Lucie Delemotte (2)\*

### *Affiliations*

1. Laboratory of Structural Neurobiology, Department of Cellular and Molecular Medicine, Faculty of Medicine, KU Leuven, Leuven, Belgium

2. Department of Applied Physics, Science for Life Laboratory, KTH Royal Institute of Technology, Solna, Sweden

3. Department of Biochemistry and Biophysics, Science for Life Laboratory, Stockholm University, Solna, Sweden

\*Corresponding authors: [lucied@kth.se](mailto:lucied@kth.se), [chris.ulens@kuleuven.be](mailto:chris.ulens@kuleuven.be), [rebecca.howard@dbb.su.se](mailto:rebecca.howard@dbb.su.se)

## Abstract

SARS-CoV-2 is the virus responsible for the COVID-19 pandemic which continues to wreak havoc across the world, over a year and a half after its effects were first reported in the general media. Current fundamental research efforts largely focus on the SARS-CoV-2 virus' Spike protein. Since successful antiviral therapies are likely to target multiple viral components, there is considerable interest in understanding the biophysical role of its other proteins, in particular structural membrane proteins. Here, we have focused our efforts on the characterization of the full-length E protein from SARS-CoV-2, combining experimental and computational approaches. Recombinant expression of the full-length E protein from SARS-CoV-2 reveals that this membrane protein is capable of independent multimerization, possibly as a tetrameric or smaller species. Fluorescence microscopy shows that the protein localizes intracellularly, and coarse-grained MD simulations indicate it causes bending of the surrounding lipid bilayer, corroborating a potential role for the E protein in viral budding. Although we did not find robust electrophysiological evidence of ion-channel activity, cells transfected with the E protein exhibited reduced intracellular  $\text{Ca}^{2+}$ , which may further promote viral replication. However, our atomistic MD simulations revealed that previous NMR structures are relatively unstable, and result in models incapable of ion conduction. Our study highlights the importance of using high-resolution structural data obtained from a full-length protein to gain detailed molecular insights, and eventually permitting virtual drug screening.

## Introduction

On March 11, 2020, the World Health Organization (WHO) declared the SARS-CoV-2 outbreak a global pandemic. The scale and the severity of the disease, as well as the speed at which this virus is still spreading and causing societal and economic disruption are alarming. However, the remarkable efforts across the globe pushing for the development of vaccines preventing infection by SARS-CoV-2 is progressing at a rapid pace both in industry and academia. In addition to the development of vaccines, research has focused on novel therapeutic strategies, including antivirals, to treat infections. Though significant milestones continue to be achieved concerning the pathogenicity of the novel coronavirus, our knowledge of the molecular mechanisms of its infection, replication, and treatment remains limited.

Coronaviruses are enveloped in a lipid bilayer with a diameter of ~125 nm, which houses the Spike (S) protein along with the membrane (M), envelope (E), and nucleocapsid (N) structural proteins.<sup>1</sup> Much of the current research efforts are focusing on the virus's pathogenic protein, the S protein, responsible for its human receptor recognition as a target for the development of various therapies and vaccines. Nevertheless, some antiviral therapies are based on simultaneously disrupting several parts of the viral proteome. Thus, the study of other SARS-CoV-2 proteins appears important as well.

Many viruses contain ion channels, generally referred to as viroporins,<sup>2</sup> small hydrophobic proteins that co-assemble to form ion channel pores that permeate ions across the cell membrane or integrate into cellular compartments such as the endoplasmic reticulum (ER) or Golgi apparatus, thereby disrupting different physiological properties of the cell. One of the most widely studied examples of viroporins is the M2 proton channel from the influenza A virus,<sup>3</sup> whose structure has revealed detailed insights into the molecular mechanism of the channel, the mechanism of inhibition by anti-influenza drugs, and the effect of mutations causing resistance.<sup>4,5</sup> Viroporins are crucial for viral pathogenicity due to their role in different steps of the viral life cycle, including viral replication, budding, and release.<sup>5</sup>

The SARS coronaviruses also contain such viroporins. In the 2003 SARS-CoV, three viroporins, E, ORF3a, and ORF8a were identified, of which E and ORF3a were shown to be required for maximal SARS-CoV replication and virulence.<sup>6</sup> The E protein is the smallest (~8.4 kDa) and most enigmatic of the viral structural proteins, and has been reported to form cation-selective ion channels.<sup>7-9</sup> It was also demonstrated that the E protein contributes to viral pathogenesis and forms a target for antiviral drug development.<sup>9-12</sup> Characterization of the electrophysiological properties of the E protein have been hampered by the fact that the E protein may not be efficiently targeted to the plasma membrane but to the ER-Golgi compartments.<sup>13,14</sup> Structures have also been elucidated using NMR spectroscopy for peptides corresponding to the transmembrane region or various other truncations, revealing a transmembrane  $\alpha$ -helix;<sup>15,16</sup> suggesting, along with blue-native gels and a very recent solid state NMR structure of the E protein from SARS-CoV-2,<sup>17</sup> that the oligomeric assembly of the E ion channel could be a pentamer, although this is not yet directly validated by structural data for the full-length ion channel.

Almost all studies aiming to circumnavigate the dearth in functional information concerning the E protein have implemented a technique of reconstituting purified proteins or synthesized peptides

into artificial lipid bilayers.<sup>6,11,18,19</sup> However, since a comprehensive functional characterization of the full-length protein has not yet been performed, the relevance of the E protein rests in its well-documented role as a fundamental pro-inflammatory SARS-CoV virulence factor.<sup>18,20–22</sup> Additionally, several studies have shown that the E protein is essential for viral replication, suggesting that novel inhibitors of the protein could work post-viral entry before new viral particles are able to bud and infect other cells.<sup>6</sup>

In the present study, we aimed to achieve a comprehensive biophysical and functional characterization of the E protein from the novel coronavirus. We expressed the E protein from SARS-CoV-2 fused to an EGFP to study the cellular localization of the protein. Combining these with coarse-grained (CG) molecular dynamics (MD) simulations, we also provide evidence for a membrane curvature effect imposed by the E protein, which is compatible with its purported role in budding and virus particle formation. Additionally, we report a lack of robust electrophysiological data for the E protein expressed in HEK293 cells recorded using the whole-cell patch clamp technique. Furthermore, atomistic MD simulations based on structural models of pentameric E protein resulted in a collapsed state consistent with a non-conducting conformation of the ion channel. Insight into the function and structure of these viroporins provides an interesting avenue to develop therapies with selective modulation against these proteins, namely due to the lack of homology between coronavirus viroporins and human ion channels.

## Results

### Primarily intracellular expression of E protein

We initially performed a sequence alignment to compare the E protein from SARS-CoV of 2003 and the novel coronavirus (SARS-CoV-2). While the E protein from SARS-CoV is one residue longer, the two variants remain nearly identical, with three mismatches in the C-terminal domain (Fig. 1A). We also aligned the truncated sequences of the E protein from SARS-CoV and SARS-Cov-2 used for previous NMR-based structure determination, including a truncated peptide encoding residues 8-65 of the SARS-CoV E protein (E Trunc (2MM4/5X29)),<sup>23,24</sup> and a peptide encoding the transmembrane domain of the SARS-CoV-2 E protein (residues 8-38, E TM (73KG))<sup>17</sup> (Fig. 1A). Here, we report on the full-length E protein from SARS-CoV-2. We synthesized this gene and incorporated a cleavable EGFP and 8x-histidine affinity tag for expression and purification in Sf9 cells. After expression, we solubilized the E protein with a 10:1 mixture of n-dodecyl- $\beta$ -D-maltoside and cholesteryl hemisuccinate (DDM/CHS), and using fluorescence-based size exclusion chromatography<sup>25</sup> equipped with a Superose 6 column, we observed that the E protein expresses and forms stable complexes (Fig. 1B). After cleaving the affinity tags, we loaded the purified E protein onto a size exclusion column equipped with a Superdex 200 10/300 Increase column, and observed that the protein elutes as a monodisperse peak around ~16.5 mL (Fig. 1C), which corresponds to an oligomeric band of ~35 kDa on SDS-PAGE (Fig. 1D). Our results here show for the first time, to our knowledge, that the full-length E protein from SARS-CoV-2 is capable of multimeric assembly independent of ligands or other factors.

Next, we synthesized a covalently-linked EGFP gene to the C-terminus of the E protein to visualize where the novel viroporin was being trafficked or compartmentalized in HEK293T cells. We transfected this construct and imaged 24 hours post transfection using confocal microscopy (Fig. 2A). Our results were consistent with previous reports examining the localization of the E protein from other CoVs, showing that the majority of the E protein remains intracellular, most likely around the ER and ER-Golgi intermediate compartment (ERGIC), as shown by the protein's colocalization with the ER-Tracker<sup>TM</sup> signal (Fig. 2A).

It is well-known that many proteins encode export or retention signals, including the  $\alpha$  subunits of the nicotinic acetylcholine receptor, which houses a signal peptide on its N-terminal extracellular domain that aids in translocating the protein to the plasma membrane.<sup>26</sup> To enable us to better perform functional studies of the E protein, we attempted to improve the protein's expression at the plasma membrane (PM) by synthesizing a modified gene with this signal peptide from the  $\alpha 7$ nAChR subunit incorporated at the N-terminus of the E protein to examine if there would be an increase in surface expression; however, we did not observe any marked improvement in plasma membrane expression (Fig. 2B). Additionally, previous reports studying the localization of envelope proteins from various CoVs indicate conserved retention motifs; namely a beta-proline-beta motif in the C-terminus that acts as an ER retention signal.<sup>13,23</sup> We performed single point mutagenesis to switch this conserved proline at position 54 to an alanine in an attempt to eliminate the retention signal. However, in contrast to previous reports expressing this mutated construct in the E protein from SARS-CoV, or inserting more extensive Golgi-export signals from mammalian channels<sup>27</sup>, we did not observe any significant improvement in PM expression for the novel protein (Fig. 2C). Thus, even with modification to the signal sequences, we did not see any significant

increase in protein export to the PM (Fig. 2B-C); suggesting that the limited surface expression may be consistent with the purported role of the E protein in virus budding at the ERGIC.

### E protein induces membrane curvature in coarse-grained simulations

Budding is an important stage of the viral life cycle,<sup>2</sup> and the E protein is hypothesized to induce bending of the membrane, which would play a pivotal role in the process.<sup>7</sup> To investigate this, we carried out coarse-grained MD simulations, enabling us to model membrane systems large enough to be able to undergo structural deformation over the multi-microsecond simulation length. We then measured the local membrane curvature around an E-protein pentamer (Fig. 3A) derived from an NMR structure of a portion of the SARS-CoV E protein (PDB ID: 5X29).<sup>24</sup> The E-protein pentamer significantly bent the membrane for both outer and inner leaflets in a direction that would facilitate viral budding, compared to a pure lipid-bilayer patch, the E-protein monomer, or the ORF3a protein (Fig. 3B-C).

To test the role of the cone shape of the initial E-protein model in driving membrane curvature, we performed a simulation with a bilayer of the same size and composition, inserting 20 E-protein monomers (PDB ID: 2MM4) randomly in the membrane. Although symmetric pentamers did not form over the 20  $\mu$ s simulation time, the aggregation of monomers induced bending of the membrane around the major cluster (Fig. 3D-F). This suggests that the cone-shaped structure of the pentameric assembly is not actually required for membrane bending, and that the topology of the monomer featuring a transmembrane and interfacial amphiphilic helix could instead be an important determinant of membrane bending. While the precise budding mechanism of the E protein from SARS-CoV-2 remains elusive, these CG models provide an initial observation of the important role of the protein on membrane bending.

### Intracellular calcium depletion in E-protein transfected cells

Animal viruses are adept at tailoring the cell's innate  $\text{Ca}^{2+}$  toolkit to provide sufficient opportunities for the host cell to adjust to the virus infection.<sup>28</sup> In general, virus infection elicits an increase of intracellular  $\text{Ca}^{2+}$  levels as a result of altered plasma membrane permeability as well as changes in membrane permeability of internal  $\text{Ca}^{2+}$  stores.<sup>29</sup> To evaluate whether this phenomenon was present in E-transfected cells, we used a  $\text{Ca}^{2+}$  ionophore, Ionomycin (IO), to empty all  $\text{Ca}^{2+}$  stores in cells transfected with the E protein (Fig. 3A-B). We observed that the total  $\text{Ca}^{2+}$  content, determined by the area under the curve (AUC), was decreased by about 61.5% in cells transfected with the E protein ( $0.1286 \pm 0.0745$  AU,  $N = 22$ ) compared to non-transfected cells ( $0.2002 \pm 0.096$ ,  $N = 19$ ;  $p = 0.01$ ) (Fig. 3C). The amplitude was also significantly diminished in E-transfected cells (E:  $0.04649 \pm 0.0338$  vs. NT:  $0.1036 \pm 0.0582$ ,  $p < 0.001$ ) (Fig. 3C). These results illustrate that cells transfected with the E protein show a depletion of  $\text{Ca}^{2+}$  upon IO-induced release of intracellular  $\text{Ca}^{2+}$  stores, suggesting the protein plays a role in leaking, suppressing, or sequestering  $\text{Ca}^{2+}$  from multiple standard compartments.

We then looked to further characterize the function of the protein as a viroporin. Many human viruses contain pore-forming proteins to modulate cellular functions and regulate viral functions at different stages of its life cycle. While they tend to be small proteins of ~60-120 amino acids in length, their absence does attenuate viral fitness and its pathogenic effects.<sup>30-32</sup> Viroporins from other viruses have been shown to transport mainly cations such as protons ( $\text{H}^+$ ), sodium ( $\text{Na}^+$ ), potassium ( $\text{K}^+$ ), and calcium ( $\text{Ca}^{2+}$ ).<sup>33-35</sup> To examine the permeability of these cations in the E

protein, we patch clamped HEK293T cells transfected with the E protein, and applied a voltage ramp from -150 mV to +150 mV. We observed no change in current in response to extracellular buffers containing Na<sup>+</sup>, K<sup>+</sup>, or Ca<sup>2+</sup> (Fig. S1A). We observed a similar response from two-electrode voltage clamp recordings in *Xenopus laevis* oocytes microinjected with E-protein cRNA (data not shown). Next, we investigated the channel's sensitivity and/or permeability to protons by decreasing the pH of our standard extracellular buffer and measuring the current in response to a voltage ramp. From a pH of 6 and lower, we saw robust, outwardly rectifying currents, reaching a current density at 100 mV of  $86.9 \pm 48.9$  pA/pF in buffer equilibrated to pH 4 (N = 19) (Fig. S1B). Though these current densities appeared to be higher in E-transfected cells compared to non-transfected cells ( $52.2 \pm 58.5$  pA/pF; N = 10) (Fig. S1C), the difference was not statistically significant ( $p = 0.08$ ) (Fig. S1C).

Since HEK cells harbor an endogenous, pH-sensitive anion channel, TMEM206,<sup>36</sup> we further characterized the current we observed in E-transfected cells to confirm its identity. In response to voltage steps from -160 mV to +40 mV, we observed outward currents in buffer conditions at pH 4 with similar kinetics to the endogenous TMEM206 (Fig. S1E-F).<sup>37</sup> A time course of the current response after dropping the extracellular buffer pH from 7.4 to 4 indicated a fast increase in outward current and a relatively quick decay, also similar to that of TMEM206 in similar conditions (SI Fig. 1G). Ullrich et al., also identified TMEM206 currents could be blocked by pregnenolone sulfate (PS), an endogenous neurosteroid. We thus tested the effect of 50  $\mu$ M PS in pH 4 conditions in E-transfected cells and non-transfected cells, and observed that PS could effectively reduce the outward current by 88% in E-transfected cells and 95% in non-transfected cells (SI Fig. 1H). Although we cannot rule out a proton response of E-protein channels, we hypothesize that the marginally higher current in E-transfected cells could be due to an off-target upregulation of endogenous channels post-transfection, emphasizing the importance of caution in interpreting pH-sensitive currents in transfected cells.

#### Limited stability and permeation in NMR-based models

Given that our reconstitution, expression, CG, and calcium-transport experiments supported a functional role for the E protein in intracellular regulation, we finally used atomistic MD simulations to probe models of E-protein structure and dynamics. MD simulations require an initial structure of the studied protein obtained from experiment or homology modeling, and in many cases, the results of the simulations are predicated on the quality of the starting structure. At the time of this work, we identified three plausible templates for the SARS-CoV-2 E protein: a pentameric solid-state NMR ensemble representing the transmembrane domain in an apparent closed state (residues E8–R38, PDB ID: 7K3G), and monomeric and pentameric ensembles derived from solution-NMR studies of the SARS-CoV homolog (residues E8–L65, PDB IDs: 2MM4 and 5X29, respectively).

The solid-state NMR SARS-CoV-2 E protein (PDB ID: 7K3G), representing only the transmembrane helices with a  $3_{10}$ -helix transition at the N-terminal end (residues F20–F23),<sup>17</sup> was simulated using either the CHAMM36m or AMBER99SB-ILDN + Slipids force fields, both in the presence and absence of a 300-mV potential on the C-terminal side. To maintain pore stability, we equilibrated the principal model with pentameric pore restraints as previously reported for other pentameric ion channels.<sup>38</sup> Throughout all simulations, the pore was dehydrated, consistent with a closed or nonfunctional state of the channel. All simulations deviated dramatically from the



starting model (4–7 Å RMSD, Fig. S2A) and lost their initially pentameric symmetry. Indeed, in all cases the protein tilted substantially to form an acute angle with the membrane normal, and twisted with respect to the symmetry axis (Fig. S2). Our simulations also showed that the  $3_{10}$  helical twist relaxed to a more classical alpha-helix (Fig. S2B), even in the AMBER99SB-ILDN force field, which has a slight preference to stabilize  $3_{10}$  helices.<sup>39</sup>

The solution-NMR SARS-CoV E protein (PDB ID: 5X29) represented a larger portion of the sequence with more classical alpha-helical transmembrane helices, and with a pore possibly wide enough for ion conduction, providing a plausible model to investigate permeation as well as stability. We therefore explored this system using several ensemble members, equilibration protocols, force fields (CHARMM36m and AMBER99SB-ILDN + SLipids), and post-translational modifications (Table S1). With only one exception, a common pattern emerged, where after the release of the restraints, the hydrophobic pore of the E protein dehydrated and the protein structure rapidly lost its initial symmetry (4–7 Å RMSDs). Simulations based on a pentameric assembly of the monomeric SARS-CoV E protein (PDB ID: 2MM4) also showed poor structural stability, in addition to pore dehydration (Table S1). The most stable model was obtained from a SWISS-model homology model of the first ensemble member in the CHARMM36m force field, with no post-translational modifications; among three simulations carried out under these conditions, one trajectory using pentameric equilibration restraints<sup>38</sup> and a 300 mV transmembrane potential retained a relatively stable, hydrated pore (Fig. 5A-B). Several computational electrophysiology simulations starting from this model eventually dehydrated; therefore, we can conclude that our most stable simulation only retains a conductive pore on the hundreds-of-nanoseconds timescale.

To further probe the ability of the most stable E-protein model (Table S1) to conduct ions, we carried out accelerated-weight histogram (AWH) simulations to assess the permeation and relative selectivity of four ions, including chloride ( $\text{Cl}^-$ ),  $\text{K}^+$ ,  $\text{Na}^+$  and  $\text{Ca}^{2+}$ . Starting from the final coordinates of the most stable 5X29 atomistic MD simulation, subsequent pore collapse was prevented by  $\text{C}\alpha$  harmonic restraints, and permeating ions were allowed to explore the conformational landscape in a 10-Å radius cylinder around the central pore axis. Over the course of the simulations, the pore remained hydrated and several ion passages were observed (Fig. S3). The one-dimensional free-energy profiles, calculated using adaptive biasing along the Z-axis, showed a principal barrier at the midpoint of the channel axis (Fig. 5C). This position corresponded to residue F26, the most frequent contact ( $\geq 30\%$ ) for all ions; other contacts ( $\geq 10\%$ ) included N15 at the N-terminal entrance to the pore and L37 at the C-terminal entrance (Fig. 5D–E). The principal F26 barrier exceeded 20 kJ/mol for both monovalent and divalent ions (Fig. 5C); the free-energy barrier for  $\text{Ca}^{2+}$  permeation was 67 kJ/mol, higher even than monovalent ions and incompatible with conduction. Thus, stability and permeation profiles of available E-protein models showed little correspondence with functional profiles from coarse-grained simulations and calcium imaging, suggesting a need for further structural characterization.



## Discussion

### Localization in human cells & implications for virus assembly

The findings described above shed light on functional and structural properties of the SARS-CoV-2 E protein using a range of biophysical methods, emphasizing potential pathways for future investigation or development, while also highlighting challenges or gaps in existing knowledge and structure-function models. Our first goal was to confirm the localization of our E-protein GFP fusion construct in transfected HEK293T cells. Previous reports studying envelope proteins of various viruses have pointed to intracellular localization; however, this property could not be assumed for coronaviruses, which are distinct in that they bud into the ERGIC prior to export through the host secretory pathway.<sup>40</sup> From our confocal data, we observed that the protein was indeed intracellular even in the context of biochemical fusion partners, and overlapped with the fluorescent signal recognizing the ER. This result confirms not only that the E protein from the novel coronavirus may serve similar biological roles as its predecessors, but that our fluorescently tagged fusion protein does not disrupt intracellular expression or localization.

Also consistent with a strong intracellular preference, targeting the E protein to the PM for comprehensive electrophysiological characterization proved challenging, as the export-signal additions and retention-signal mutations implemented in this work did not produce definitive evidence of surface function. Precise identification of signaling elements responsible for E-protein targeting would provide insight into how CoVs interact and take advantage of host machinery to assemble new virions, and will likely merit further investigation; indeed, promising results in this regard were reported by another group during preparation of this manuscript.<sup>27</sup>

### Oligomerization of purified SARS-CoV-2 E protein

Despite the preferential localization documented above, overexpression and purification of a GFP/octahistidine-tagged E-protein construct in Sf9 insect cells enabled isolation of a monodisperse oligomeric complex. These results complement earlier biochemical reports that the isolated SARS-CoV variant forms multimers, possibly pentamers.<sup>12,24,41</sup> Although the precise stoichiometry of detergent-solubilized E protein cannot be determined definitively by gel filtration, analysis of our peak SEC fraction — particularly allowing for glycosylation — suggested a tetrameric or smaller complex.

Notably, NMR studies presuming pentameric assembly of SARS-CoV or SARS-CoV-2 E proteins have produced divergent structures. In dodecylphosphocholine (DPC) micelles, the SARS-CoV variant was reported as a pentameric assembly with helical left-handedness, where the side chains of residues V25 and V28 could act as a channel gate.<sup>16</sup> A more recent study, in lyso-myristoyl phosphatidylglycerol (LMPG) micelles, reported an interhelical orientation for the side chain of V25 and helical kink with an overall right-handedness.<sup>24</sup> The E-protein transmembrane domain also contains three sequential phenylalanine residues, spaced three residues apart from each other. Surya et al. reported a protein state in which the aromatic side chains of these residues are positioned towards the lumen of the pore. In comparison, the most recently published solid-state NMR spectroscopy-derived structure of the E protein from SARS-CoV-2 reveals a continuous state with these side chains oriented away from the pore and a closed state where the middle aromatic residue, F26, rotates inward, thereby constricting the pore.<sup>17</sup> Such widely variant

properties of reported structures highlight the need for further biophysical characterization of full-length E-protein assembly, structure, and membrane-transport function, if any.

### Coarse-grained simulations model E-protein effects in a realistic cell membrane

Our CG simulations illustrated the capacity of E protein to induce a degree of membrane curvature, consistent with a role in membrane budding during viral replication and assembly. With few exceptions, lipid diffusion around membrane proteins is too slow to sample efficiently on the timescales of atomistic MD simulations;<sup>42</sup> accordingly, CG simulations have been applied to study realistic cell-membrane dynamics.<sup>43</sup> These methods can accurately measure or predict binding of specific lipids to proteins<sup>44</sup> and can, on a larger scale, model changes in shape of biological membranes.<sup>45</sup> We captured the membrane-curvature dynamics induced by the E protein by embedding it into a bilayer broadly mimicking the composition and charge of the Golgi membrane. In CG simulations, the protein's secondary structure needs to be maintained by restraining either the backbone interactions, or the overall conformation of the protein using elastic network approaches;<sup>46</sup> such restraints limit the ability of CG simulations to probe the dynamics of the protein itself, described in more detail below. It should also be noted that protein-protein interactions are exaggerated in the Martini 2 force field,<sup>47</sup> which could explain why disordered clusters of monomers irreversibly formed instead of symmetric pore-like assemblies. Furthermore, although we used a lipid mixture that mimics a realistic membrane composition, other viral proteins were absent, such that we could not capture possible interactions with, for example, the M or S proteins.<sup>48,49</sup>

Owing to its name, mature coronavirus particles take on a spherical shape, due in considerable part to the assembly of the virion envelope at the ERGIC.<sup>40,50</sup> During assembly, CoV M and E proteins contribute to producing and pinching off virus-like particles (VLPs).<sup>51-53</sup> This phenomenon was further confirmed in a recent study illustrating that expression of both M and E proteins also regulates the maturation of N-glycosylation of the S protein.<sup>48</sup> Since this event usually occurs in the Golgi, it remains possible that the presence of M and E proteins could alter the function of glycosyltransferases.<sup>54</sup> In fact, in the absence of the E protein, recombinant CoVs deviate from their typical morphologies, producing propagation-deficient virions.<sup>22,30,48,55</sup> Nevertheless, since CoVs are still capable of assembling without the E protein, the direct role of the E protein in the broader setting of virus infection points more towards inducing a favorable membrane environment into which viral prodigy can insert. Notably, envelope proteins have recently been shown to slow the secretory pathway.<sup>48,56</sup> However, since the exact topology of the E protein remains unclear, we cannot presently deduce the precise mechanism by which this event occurs, although interesting speculations have been proposed.<sup>7</sup>

### Implications for calcium homeostasis and viral porin function

The dynamic between a virus and the host cell's Ca<sup>2+</sup>-signaling pathways and other Ca<sup>2+</sup>-dependent processes is evidenced by direct and/or indirect imbalances in Ca<sup>2+</sup> homeostasis parameters resulting from affected membrane permeabilities, sequestration of Ca<sup>2+</sup>, and/or Ca<sup>2+</sup>-regulated virus-host interactions. Elevated cytosolic Ca<sup>2+</sup> may benefit the virus by prompting mitochondrial uptake and thus elevating ATP production to meet higher demands for viral replication.<sup>57,58</sup> Concurrently, an acceleration of Ca<sup>2+</sup>-dependent enzymatic processes may induce Ca<sup>2+</sup>-dependent transcription factors to promote virus replication, as is seen with HIV-1,<sup>59</sup> HCV,<sup>60</sup> and HTLV-1,<sup>61</sup> among others. Similarly, a decrease in Ca<sup>2+</sup>-store content could drive inhibition of

protein trafficking pathways, hampering the innate immune responses and allowing the virus to escape premature clearance by the host.<sup>28,62,63</sup> A potentially instructive example is the well-characterized nonstructured protein from the enterovirus family, which causes a decrease in ER  $\text{Ca}^{2+}$  by assembling into pore-forming units, permeabilizing the membrane, and eliciting  $\text{Ca}^{2+}$  efflux.<sup>64,65</sup>

We found that transfection with E protein lowered cytosolic  $\text{Ca}^{2+}$  compared to non-transfected cells, possibly due to the sequestration of  $\text{Ca}^{2+}$  by  $\text{Ca}^{2+}$  binding proteins (CaBPs). CaBPs, consisting of chaperones and buffers located throughout the lumen of the ER, help ensure that the  $[\text{Ca}^{2+}]_{\text{ER}}$  remains within an appropriate range, which is essential for the maintenance of persistent  $\text{Ca}^{2+}$  signals and post-translational processing, folding, and export of other proteins.<sup>66-68</sup> In the broader setting of virus infection, it is also possible that the E protein could exert an anti-apoptotic activity, as it would post-infection. Upon virus entry, the cellular apoptotic pathway is immediately triggered as a defense mechanism in response to infection. A sudden increase in cytosolic  $\text{Ca}^{2+}$  could also trigger this pathway, as can the overloading of the mitochondria with  $\text{Ca}^{2+}$ , resulting in a release of cytochrome c and activation of caspase 9, committing the cell to apoptosis.<sup>69</sup> In this light, it is plausible that the virus hijacks the cell's  $\text{Ca}^{2+}$  homeostasis machinery to quickly sequester or export  $\text{Ca}^{2+}$  from the cytoplasm, in effect, keeping mitochondrial  $\text{Ca}^{2+}$  levels low to promote cell survival.<sup>28,70</sup>

In contrast to our  $\text{Ca}^{2+}$ -depletion results, electrophysiological currents at the PM could not be conclusively distinguished from endogenous or background effects in this work, highlighting persistent ambiguities in E-protein ion-transport function. Earlier reports using truncated SARS-CoV E-protein peptides, reconstituted in artificial lipid bilayers, indicated contrasting and variable permeabilities for  $\text{Na}^+$ ,  $\text{K}^+$ , and  $\text{Cl}^-$ .<sup>9,12,18</sup> The composition of the bilayer has also been reported to influence E-protein selectivity, with greater cation selectivity in the presence of negatively charged lipid headgroups.<sup>8</sup> However, selectivity has often been based on reversal potential measurements confounded by small, variable currents; other electrophysiological characterizations reported poor signal-to-noise profiles with often indistinct gating events.<sup>9,12,71</sup> Considerations such as the regulation of endogenous channels in heterologous expression systems, reproducibility of robust electrical activity, and accurate identification of foreign proteins in reconstituted environments may be particularly important in documenting conduction properties of small viroporins such as the E protein.

Since the  $[\text{Ca}^{2+}]$  gradient across the cytoplasm to the lumen of the ER/Golgi apparatus is one of the highest and most regulated ion gradients observed in cells,<sup>28,72,73</sup> one possible explanation for our observations *in vivo* could be explained by the transmembrane voltage that would open the pore and allow  $\text{Ca}^{2+}$  to permeate through, which is consistent with the 450 mV transmembrane voltage applied in computational electrophysiology simulations by Cao et al.<sup>74</sup> Consistent with this proposal, our most stable open simulation was produced in the presence of an electric field. Elucidating the effects of transmembrane voltage induced by viroporins would be an interesting line of investigation as these characteristics have been observed for other viruses as well.<sup>75-77</sup>

#### Limited stability and permeation in reported structures

One of the most important modelling decisions in molecular dynamics simulations is the choice of initial structure. The quality and usefulness of simulations are predicated on the quality and

usefulness of the structural information used as input. Our atomistic MD simulations were initiated from the only available E-protein structures, or models based on them, which were obtained via solution or solid-state NMR. It is well known that protein NMR structures can be influenced by modelling assumptions, such as oligomerization state.<sup>78</sup> Notably, the C-terminal domain of the E protein has been reported as partially disordered,<sup>79</sup> making it challenging to characterize by structural or simulation methods despite its apparent influence on the protein's cone-like shape and membrane-curvature effects. Given that flexible proteins and ion interactions may be variably described by current protein force fields, we tested a range of simulation conditions and structure variants in pursuit of a stable open model (Table S1). Simulations of the SARS-CoV-2 E-protein structure from solid-state NMR (PDB ID: 7K3G) were incompatible with conduction, and failed to maintain a the  $3_{10}$ -helix twist required to satisfy modeling assumptions.

Only one condition, based on solution NMR (PDB ID: 5X29), produced a relatively stable open state in our hands, with a putative hydrophobic gate at the F26-midpoint of the pore. Even this model was stable only on the hundreds-of-nanoseconds time scale, and was not evidently permeable to  $\text{Ca}^{2+}$ . Although several articles and preprints in the past year<sup>74,79–84</sup> have reported simulations of this structure, a review of their results shows similar limitations, with abbreviated timescales,<sup>80–82</sup> reliance on secondary-structure restraints,<sup>74</sup> elevated RMSDs,<sup>74,80</sup> and/or dewetting in the absence of electric fields.<sup>74</sup> Instability of the open structure may reflect underdetermination of the starting protein or membrane models, unresolved interactions with the C-terminal or other domains, or other factors yet to be identified.

Taken together, we have shown that recombinantly expressed full-length E protein from SARS-CoV-2 is capable of independent multimerization, possibly as a tetrameric or smaller species. We also confirmed that the protein localizes intracellularly, similar to its predecessor from SARS-CoV, with no evidence of ion channel properties at the cell surface. Our coarse-grained simulations further support a role for the E protein in viral budding, as the presence of the protein bends the surrounding membrane. Reduction of intracellular  $\text{Ca}^{2+}$  in E-protein-transfected cells may further promote viral replication. However, our atomistic simulations and permeation calculations based on previously reported NMR structures resulted in unstable proteins incapable of  $\text{Ca}^{2+}$  conduction. We emphasize the importance of using high-resolution structural data obtained from a full-length protein to gain detailed molecular insight of the E protein, and enable future drug-screening efforts.

## Materials & Methods

### Cloning and Expression

For microscopy and electrophysiology, the coding sequence for the E protein from SARS-CoV-2 was initially codon optimized for *Xenopus laevis* and synthesized (GenScript, Piscataway, NJ). The gene was later modified for expression in HEK293 cells by adding a fluorescent EGFP tag, in frame, to the C-terminus of the E-protein sequence via overlap extension PCR and subsequently subcloning the product into a pcDNA3.1 vector; generating the EcGFP construct. HEK293T cells were transiently transfected by this construct using Mirus TransIT-293 (Mirus Corporation). Transfected cells were seeded for imaging or electrophysiology experiments 24 hours post-transfection.

### Purification

The full-length E-protein sequence from SARS-CoV-2 (GenBank Accession: NC\_045512.2) was purchased from GenScript as a synthetic gene with optimized codon use for expression in *Xenopus laevis*. The gene was subcloned in the pFastBac1 (for Sf9 expression) and pEG-BM (for HEK293 expression) vectors and baculovirus was generated according to the bac-to-bac baculovirus expression system.<sup>85</sup> Infected cells were harvested 72 hrs post infection and lysed with an EmulsiFlex C5 (Avestin, Ottawa, Canada). Lysate was separated by ultracentrifugation at 100,000 x g at 4 °C for 1 hour and resuspended in an equivalent volume of extraction buffer containing 50 mM Tris-HCl (pH 7.5), 200 mM NaCl, 5 mM MgCl<sub>2</sub>, 100 µg/mL DNaseI, 1 mM PMSF, and protease inhibitors (1 µg/mL leupeptin, 1 µg/mL pepstatin, 1 µg/mL aprotinin). Protein was solubilized with the addition of 0.1% (v/v) DDM/CHS (Anatrace) for 2 hours at 4 °C. Solubilized protein was cleared by ultracentrifugation at 30,000 x g at 4 °C for 30 min and resuspended in buffer containing 50 mM Tris-HCl (pH 7.5), 200 mM NaCl, 5 mM MgCl<sub>2</sub>, and 0.003% (v/v) DDM/CHS. The solution was then purified by affinity chromatography after incubation for 1 hour on Nickel-Sephrose beads (Cytiva) at 4 °C. The column was washed with 5 column volumes of the same buffer + 40 mM imidazole, and protein was eluted with 3 column volumes of the same buffer + 300 mM imidazole. The eluent was then purified again by affinity chromatography after incubation with anti-GFP beads (GFP-nanobody corresponding to sequence of PDB ID: 3OGO coupled to NHS-activated agarose beads according to manufacturer's protocol) for 1 hour at 4 °C. The solution was washed with the same buffer (without imidazole). The E protein was cleaved from the EGFP-8xHis fusion by incubation of the beads with 150 units of thrombin (Sigma-Aldrich) overnight at 4 °C. Cleaved E protein was concentrated using a 10 kDa MWCO concentrator (Millipore Sigma) to ~ 1 mL and further purified on a Superdex 200 10/300 Increase (GE Healthcare) column equilibrated with buffer containing 20 mM Tris-HCl (pH 7.5), 150 mM NaCl, 1 mM MgCl<sub>2</sub>, and 0.03% (v/v) LMNG. Peak fractions corresponding to oligomeric fractions were pooled and concentrated to ~2 mg/mL. Samples were collected throughout the purification process, loaded with Laemmli loading buffer, and denatured at 95 °C for 10 min for analysis on a 4-15% SDS-PAGE under reducing conditions.

### Microscopy

HEK293T cells were seeded on an 18 mm diameter coverslip and transiently transfected with the constructs mentioned above (Results and Fig. 2). 24 hr post-transfection, cells were loaded with a dye to visualize the ER (ER-Tracker™ Blue-White DPX; ThermoFisher Scientific) at a final concentration of 0.5 µM for 20 min at 37 °C and 8% CO<sub>2</sub>. Cells were washed with phosphate-



buffered saline (PBS), and subsequently labeled with a PM probe (Wheat Germ Agglutinin-Alexa Fluor 633 conjugate (WGA-Alexa633); ThermoFisher Scientific) at a final concentration of 5  $\mu\text{g}/\text{mL}$  and incubated for 10 min at 37 °C and 8%  $\text{CO}_2$ . Cells were washed with PBS for image acquisition. All images were collected with a Zeiss LSM 880 – Airyscan using a Plan-Apochromat 63x/1.4 Oil DIC M27 objective (Cell and Tissue Imaging Cluster (CIC, KU Leuven), supported by Hercules AKUL/15/37\_GOH1816N and FWO G.0929.15 to Pieter Vanden Berghe, KU Leuven. EGFP fluorescence was excited at 488 nm, imaged at 5% laser power and a detector gain of 1100. ER-Tracker fluorescence was excited at 405 nm, imaged at 5% laser power and a detector gain of 553. WGA-Alexa633 fluorescence was excited at 633 nm, imaged at 5% laser power and a detector gain of 870. Colors were added to signals post-acquisition using default look-up tables in Fiji software.<sup>86</sup>

### Calcium imaging

Fura-2-based ratiometric intracellular  $\text{Ca}^{2+}$  measurements were performed as described previously.<sup>87,88</sup> Briefly, cells were loaded with the  $\text{Ca}^{2+}$  sensitive dye, Fura-2-acetoxymethyl ester (Fura-2AM, Molecular Probes; Invitrogen), in culture medium for 25 min at 37 °C. Experiments were performed in extracellular,  $\text{Ca}^{2+}$ -free KREBS solution containing (in mM): 150 NaCl, 6 KCl, 10 EGTA, 1.5  $\text{MgCl}_2$ , 10 glucose, and 10 HEPES buffered to pH 7.4 (NaOH). Intracellular  $\text{Ca}^{2+}$  was monitored as the ratio between fluorescence intensities upon illumination at 340 and 380 nm using an MT-10 illumination system and Olympus xcellence pro software (Olympus). After a 5-8-min baseline recording,  $[\text{Ca}^{2+}]_{\text{ER}}$  levels were assessed by the addition of 2  $\mu\text{M}$  ionomycin (IO; Calbiochem, San Diego, CA), a  $\text{Ca}^{2+}$  ionophore. IO-induced  $\text{Ca}^{2+}$  rises were regarded as  $[\text{Ca}^{2+}]_{\text{ER}}$  content that could be estimated from the area under the curve of the  $[\text{Ca}^{2+}]_i$  rise.

### Electrophysiology

Whole-cell patch clamp recordings were performed using an EPC-10 amplifier and Patchmaster software (HEKA Elektronik; Lambrecht/Pfalz, Germany). Data were sampled at 5-20 kHz and digitally filtered off-line at 1-5 kHz. Holding potential was 0 mV, and cells were ramped from -150 mV to +150 mV over the course of 800 ms, every 2 s. Pipettes with a final series resistance of 2-4 M $\Omega$  were fabricated and filled with intracellular solution. The standard intracellular solution contained (in mM): 130 Cs-Aspartate, 2 Mg-ATP, 10  $\text{MgCl}_2$ , 1 EGTA, and 10 HEPES buffered to pH 7.3 (CsOH). The standard extracellular solution contained (in mM): 135 NaCl, 5 KCl, 1  $\text{MgCl}_2$ , 2  $\text{CaCl}_2$ , 10 glucose, and 10 HEPES buffered to pH 7.4 (NaOH). Recordings to measure the effects of pH used the same standard extracellular solution buffered to pH 6.0, 5.0, and 4.0 with HCl. All measurements were performed at room temperature. Liquid junction potentials were corrected for off-line.

### Coarse-grained simulations

CG simulations were run using GROMACS 2020<sup>89</sup> with a timestep of 20 fs for 20  $\mu\text{s}$ . The standard equilibrium procedure from CHARMM-GUI<sup>90</sup> was used before the final production, in which the positions of the protein backbone beads were still restrained for sufficient sampling (except the system with multiple separated monomers). The mean temperature and pressure were kept constant at 310 K and 1 bar using the v-rescale thermostat ( $\tau=1$  ps) and the Parrinello-Rahman barostat ( $\tau=12$ ps).<sup>91,92</sup> Martini force field version 2.2 for protein and version 2.0 for lipids were used.<sup>43</sup>



For the smaller systems with one/no protein. The E-protein-pentamer model (PDB ID: 5X29) was converted to CG model with CHARMM-GUI. It was then embedded into a membrane patch that represents the ER-Golgi lipid composition (59% DOPC, 24% DOPE and 17% DOPS).<sup>8</sup> In total ~2000 lipid molecules were placed inside a rectangular simulation box with the size of 256 Å × 256 Å × 105 Å. The conformation of the E-protein monomer was preserved by applying harmonic restraints with a force constant of 1000 kJmol<sup>-1</sup>nm<sup>-2</sup> onto the backbone beads of the protein.

For the larger system of E-protein monomers, 20 E-protein monomers (PDB ID: 2MM4) were randomly placed into a simulation box with the size of 512 Å × 512 Å × 105 Å. In total 240,000 beads were contained in the system. The conformation of the E-protein monomer was restrained with the ELNEDYN elastic network.<sup>46</sup>

The membrane curvature analyses were performed on the last 10 μs with MemSurfer<sup>93</sup> tool. The mean curvatures of the smooth approximate surfaces within 25 Å of the proteins for both outer and inner leaflets were compared and plotted as Raincloud plots.<sup>94</sup> Additionally, for the larger system, the mean curvature of the last 400 ns was binned with SciPy<sup>95</sup> `binned_statistic_2d` and the last position of monomers were mapped onto the grid. The visualization snapshots were created with VMD.<sup>96</sup>

### Atomistic simulations

Molecular dynamics simulations were run using GROMACS mdrun 2019<sup>89</sup> with a timestep of 2fs, reaching timescales of 300 to 600ns. The mean temperature and pressure was kept constant at 310 K and 1 bar using the v-rescale thermostat (tau=1ps) and the Parrinello-Rahman barostat (tau=5ps).<sup>91,92</sup> The systems employed the CHARMM36m force field<sup>97</sup> or the AMBER99SB-ILDN + Slipids forcefield.<sup>98-100</sup> Bonds involving hydrogen were constrained using LINCS<sup>101</sup> and the TIP3P<sup>102</sup> water molecules were kept rigid with SETTLE.<sup>103</sup> The van der Waals interactions were switched with "Force-Switch" from 10 Å to 12 Å in the case of the CHARMM36m force field, while a simple cut-off of 15Å was used with the AMBER99SB-ILDN + Slipids force field. Some of the simulations were run under a constant 300 mV external electrostatic potential to try to improve stability and water and ion permeation. Long range electrostatics were calculated with the Particle Mesh Ewald method.<sup>104</sup> The version of GROMACS used in the simulations was found to contain a bug on the external electrostatic potential feature after running these simulations. We re-ran some simulations with a patched version of GROMACS and found no significant differences. Some of the simulations used the CHARMM-GUI equilibration protocol with an extension of the duration of the steps.<sup>97</sup> In other cases, pentameric restraints were used.<sup>38</sup> Visualization of trajectories and structures was done with VMD<sup>96</sup> and data analysis with MDAnalysis.<sup>105</sup>

To our knowledge, the only available apparently open structure of a pentameric channel in this family (PDB ID: 5X29) was determined for the SARS-CoV variant based on solution-NMR constraints and the C40A, C43A and C44A engineered mutations.<sup>24</sup> For our simulations, this structure was converted to the SARS-CoV-2 wildtype sequence using the SWISS homology model<sup>106</sup> of the first model provided in the PDB file. Models 6 and 7 of the NMR structure were also used and were converted to the SARS-CoV-2 sequence using PyMOL.<sup>107</sup> Palmitoylation and N-glycosylation<sup>7,108</sup> are known post-translational modifications of the E protein. We also performed simulations in which residues C40, C43, C44 were palmitoylated and others where residue N66 was glycosylated with man5. Both modifications were added using CHARMM-GUI<sup>97</sup>

and later manually adjusted to avoid steric clashes. Additional models consisted of the SARS-CoV E-protein monomer structure (PDB ID: 2MM4) pentamerized using 5X29 as a template, and the more recent solid-state NMR pentameric TM-domain E-protein structure of SARS-CoV-2 (PDB ID: 7K3G).<sup>17</sup> All systems were prepared using CHARMM-GUI (Jo et al., 2017). The proteins were embedded in a 80Å x 80Å POPC, POPS, cholesterol (3:1:1) bilayer using the PPM server and an additional translation of -8Å perpendicular to the membrane plane. Due to the different availability of lipids in CHARMM-GUI for different force fields the AMBER99SB-ILDN + Slipids simulations used POPG lipids instead of POPS. 22.5Å water layers were added on both sides of the membrane with a salt concentration of 75 mM NaCl and 75 mM of KCl.

### Permeation calculations

A fairly stable open conformation was selected from the previous unbiased simulation 8 using the 5X29-based model (Table S1), and submitted for permeation calculations using the AWH method implemented in GROMACS2020 with the CHARMM36m force field. AWH is an extended ensemble method which samples and adaptively optimizes the ensemble, while estimating the free energy.<sup>109</sup>

Two sets of 4 AWH simulations, measuring the permeation of Cl<sup>-</sup>, Na<sup>+</sup>, K<sup>+</sup> or Ca<sup>2+</sup>, were carried out to estimate the free energy landscape of the passage of each ion through the open pore. The N-terminal unstructured loops (residues 8 to 11) were removed from each monomer to avoid an artificial high energetic barrier (as noticed from a first test of free energy calculations, data not shown) induced by the pore obstruction due to their presence. Models for AWH were built by introducing an ion (Cl<sup>-</sup>, Na<sup>+</sup>, K<sup>+</sup> or Ca<sup>2+</sup>) within the pore. The whole system was then embedded in a membrane bilayer and immersed in a solvent box with TIP3P water, NaCl and KCl ions using the CHARMM-GUI platform as described in the previous section. Six equilibration steps were performed, before the production AWH runs, by keeping the protein alpha carbons restrained and by gradually decreasing the restraints for the protein heavy atoms and lipids (head groups/dihedral angles).

For each equilibrated system, AWH bias potential was applied on the center of mass z distance between the ion and the residues F26 within the pore center. We used 6 walkers to sample multiple transition pathways within one simulation and thus enhanced the sampling and accelerated the convergence of the simulations. The sampling interval was  $z \in [-6.5, +6.5]$  and  $z \in [-6.95, +6.95]$  nm, respectively for the first and the second sets of simulations. A higher pulling distance interval permitted a better convergence of the simulations. To keep the ion close to the pore, the coordinate radial distance was restrained to stay below 1 nm (in the xy plane) from the pore center axis by using a flat-bottom position restraints (cylinder) with a force constant  $k = 10\ 000\ \text{kJ}\cdot\text{mol}^{-1}\cdot\text{nm}^{-2}$ . Alpha carbon position restraints - with force constants  $k_x, k_y, k_z = 1\ 000\ \text{kJ}\cdot\text{mol}^{-1}\cdot\text{nm}^{-2}$  - were applied to keep the pore channel hydrated and open.

The MD time step was 2 fs. Bonds involving hydrogens were constrained using LINCS. The temperature was kept at 310 K using the v-rescale thermostat and the pressure at 1 bar using Berendsen pressure coupling. Long-range electrostatics were calculated using particle mesh Ewald. Long-range Lennard-Jones interactions were calculated by switching the force to zero for atom distances 10–12 Å. The z direction was set to 0 compressibility. The simulation time was 250 ns and 100/200 ns long for the first and second sets of simulations, respectively. The *gmx awh*

module in GROMACS2020 was used to plot the free energy profiles, coordinates and target distributions.

## **Data Availability**

Input files and representative frames from CG, atomistic MD, and AWH simulations are available on Zenodo ([10.5281/zenodo.4818292](https://zenodo.org/record/4818292)).

## **Acknowledgements**

We are grateful for conceptual assistance from Professors Elisa Fadda (Maynooth University) and Ann McDermott (Columbia University), and for technical support from Professor Thomas Voets, Marijke Brams and Sara Kerselaers (KU Leuven). Financial support for this project was provided by grants from FWO-Vlaanderen (G0C9717N, G0C1319N) and KU Leuven (C3/19/023, C14/17/093), the Knut and Alice Wallenberg foundation (KAW COVID-19 research grant via SciLifeLab), the Swedish Research Council (VR), the Gustafsson Foundation, and the Swedish e-Science Research Center (SeRC). Computational time was provided by the Swedish National Infrastructure for Computing (SNIC), and by Folding@home; we are extremely grateful to all the citizen scientists who contributed their compute power to make this work possible, and to members of the Folding@home community who volunteered to help.

## **Author Contributions**

Conceptualisation: AM, SPC, YZ, AE, RJH, CU, LD; methodology: AM, SPC, YZ, AE, DP, RJH, CU, LD; software: SPC, YZ, AE, EL, LD; validation: AM, SPC, YZ, AE; formal analysis: AM, SPC, YZ, AE; investigation: AM, SPC, YZ, AE, DP; resources: EL, RJH, CU, LD; data curation: SPC, YZ, AE; original draft: AM, SPC, YZ, AE; review & editing: AM, SPC, YZ, AE, RJH, CU, LD; visualization: AM, SPC, YZ, AE; supervision: RJH, CU, LD; project administration: RJH, CU, LD; funding acquisition: EL, CU, LD.

## References

1. Lai, M. M. & Cavanagh, D. The molecular biology of coronaviruses. *Advances in virus research* vol. 48 1–100 (1997).
2. Nieva, J. L., Madan, V. & Carrasco, L. Viroporins: Structure and biological functions. *Nature Reviews Microbiology* vol. 10 563–574 (2012).
3. Pinto, L. H., Holsinger, L. J. & Lamb, R. A. Influenza virus M2 protein has ion channel activity. *Cell* **69**, 517–528 (1992).
4. Schnell, J. R. & Chou, J. J. Structure and mechanism of the M2 proton channel of influenza A virus. *Nature* **451**, 591–595 (2008).
5. Stouffer, A. L. *et al.* Structural basis for the function and inhibition of an influenza virus proton channel. *Nature* (2008) doi:10.1038/nature06528.
6. Castaño-Rodríguez, C. *et al.* Role of severe acute respiratory syndrome coronavirus viroporins E, 3a, and 8a in replication and pathogenesis. *MBio* **9**, (2018).
7. Schoeman, D. & Fielding, B. C. Coronavirus envelope protein: Current knowledge. *Virology Journal* (2019) doi:10.1186/s12985-019-1182-0.
8. Verdía-Báguena, C. *et al.* Coronavirus E protein forms ion channels with functionally and structurally-involved membrane lipids. *Virology* **432**, 485–494 (2012).
9. Wilson, L., Mckinlay, C., Gage, P. & Ewart, G. SARS coronavirus E protein forms cation-selective ion channels. *Virology* (2004) doi:10.1016/j.virol.2004.09.033.
10. Jimenez-Guardeño, J. M. *et al.* The PDZ-Binding Motif of Severe Acute Respiratory Syndrome Coronavirus Envelope Protein Is a Determinant of Viral Pathogenesis. *PLoS Pathog.* **10**, (2014).
11. Nieto-Torres, J. L. *et al.* Severe Acute Respiratory Syndrome Coronavirus Envelope Protein Ion Channel Activity Promotes Virus Fitness and Pathogenesis. *PLoS Pathog.* (2014) doi:10.1371/journal.ppat.1004077.
12. Wilson, L., Gage, P. & Ewart, G. Hexamethylene amiloride blocks E protein ion channels and inhibits coronavirus replication. *Virology* (2006) doi:10.1016/j.virol.2006.05.028.
13. Cohen, J. R., Lin, L. D. & Machamer, C. E. Identification of a Golgi Complex-Targeting Signal in the Cytoplasmic Tail of the Severe Acute Respiratory Syndrome Coronavirus Envelope Protein. *J. Virol.* **85**, 5794–5803 (2011).
14. Nieto-Torres, J. L. *et al.* Subcellular location and topology of severe acute respiratory syndrome coronavirus envelope protein. *Virology* **415**, 69–82 (2011).
15. Li, Y., Surya, W., Claudine, S. & Torres, J. Structure of a conserved golgi complex-targeting signal in coronavirus envelope proteins. *J. Biol. Chem.* **289**, 12535–12549 (2014).
16. Pervushin, K. *et al.* Structure and inhibition of the SARS coronavirus envelope protein ion channel. *PLoS Pathog.* **5**, (2009).
17. Mandala, V. S. *et al.* Structure and drug binding of the SARS-CoV-2 envelope protein transmembrane domain in lipid bilayers. *Nat. Struct. Mol. Biol.* **27**, 1202–1208 (2020).
18. Regla-Nava, J. A. *et al.* Severe Acute Respiratory Syndrome Coronaviruses with Mutations in the E Protein Are Attenuated and Promising Vaccine Candidates. *J. Virol.* **89**, 3870–3887 (2015).
19. Siu, K. L. *et al.* Severe acute respiratory syndrome Coronavirus ORF3a protein activates the NLRP3 inflammasome by promoting TRAF3-dependent ubiquitination of ASC. *FASEB J.* **33**, 8865–8877 (2019).

20. Almazán, F. *et al.* Engineering a replication-competent, propagation-defective middle east respiratory syndrome coronavirus as a vaccine candidate. *MBio* **4**, (2013).
21. Netland, J. *et al.* Immunization with an attenuated severe acute respiratory syndrome coronavirus deleted in E protein protects against lethal respiratory disease. *Virology* **399**, 120–128 (2010).
22. Ortego, J., Escors, D., Laude, H. & Enjuanes, L. Generation of a Replication-Competent, Propagation-Deficient Virus Vector Based on the Transmissible Gastroenteritis Coronavirus Genome. *J. Virol.* **76**, 11518–11529 (2002).
23. Li, Y., Surya, W., Claudine, S. & Torres, J. Structure of a conserved golgi complex-targeting signal in coronavirus envelope proteins. *J. Biol. Chem.* **289**, 12535–12549 (2014).
24. Surya, W., Li, Y. & Torres, J. Structural model of the SARS coronavirus E channel in LMPG micelles. *Biochim. Biophys. Acta - Biomembr.* **1860**, 1309–1317 (2018).
25. Kawate, T. & Gouaux, E. Fluorescence-Detection Size-Exclusion Chromatography for Precrystallization Screening of Integral Membrane Proteins. *Structure* **14**, 673–681 (2006).
26. Dash, B., Lukas, R. J. & Li, M. D. A signal peptide missense mutation associated with nicotine dependence alters  $\alpha 2^*$ -nicotinic acetylcholine receptor function. *Neuropharmacology* **79**, 715–725 (2014).
27. Cabrera-Garcia, D., Bekdash, R., Abbott, G. W., Yazawa, M. & Harrison, N. L. The envelope protein of SARS-CoV-2 increases intra-Golgi pH and forms a cation channel that is regulated by pH. *J. Physiol.* (2021) doi:10.1113/JP281037.
28. Zhou, Y., Frey, T. K. & Yang, J. J. Viral calciomics: Interplays between  $Ca^{2+}$  and virus. *Cell Calcium* vol. 46 1–17 (2009).
29. Agirre, A., Barco, A., Carrasco, L. & Nieva, J. L. Viroporin-mediated membrane permeabilization: Pore formation by nonstructural poliovirus 2B protein. *J. Biol. Chem.* **277**, 40434–40441 (2002).
30. DeDiego, M. L. *et al.* A Severe Acute Respiratory Syndrome Coronavirus That Lacks the E Gene Is Attenuated In Vitro and In Vivo. *J. Virol.* **81**, 1701–1713 (2007).
31. Wang, K. *et al.* PEDV ORF3 encodes an ion channel protein and regulates virus production. *FEBS Lett.* **586**, 384–391 (2012).
32. Watanabe, S., Watanabe, T. & Kawaoka, Y. Influenza A Virus Lacking M2 Protein as a Live Attenuated Vaccine. *J. Virol.* **83**, 5947–5950 (2009).
33. Lu, W. *et al.* Severe acute respiratory syndrome-associated coronavirus 3a protein forms an ion channel and modulates virus release. *Proc. Natl. Acad. Sci. U. S. A.* **103**, 12540–12545 (2006).
34. Mould, J. A. *et al.* Influenza B virus BM2 protein has ion channel activity that conducts protons across membranes. *Dev. Cell* **5**, 175–184 (2003).
35. Pham, T., Perry, J. L., Dosey, T. L., Delcour, A. H. & Hyser, J. M. The Rotavirus NSP4 Viroporin Domain is a Calcium-conducting Ion Channel. *Sci. Rep.* **7**, (2017).
36. Lambert, S. & Oberwinkler, J. Characterization of a proton-activated, outwardly rectifying anion channel. *J. Physiol.* **567**, 191–213 (2005).
37. Ullrich, F. *et al.* Identification of TMEM206 proteins as pore of PAORAC/ASOR acid-sensitive chloride channels. *Elife* **8**, (2019).
38. Dämgen, M. A. & Biggin, P. C. A Refined Open State of the Glycine Receptor Obtained via Molecular Dynamics Simulations. *Structure* **28**, 130-139.e2 (2020).



39. Patapati, K. K. & Glykos, N. M. Three force fields views of the 3 10 helix. *Biophys. J.* **101**, 1766–1771 (2011).
40. Hogue, B. G. & Machamer, C. E. Coronavirus Structural Proteins and Virus Assembly. in *Nidoviruses* 179–200 (ASM Press, 2014). doi:10.1128/9781555815790.ch12.
41. Torres, J. *et al.* Model of a putative pore: The pentameric  $\alpha$ -helical bundle of SARS coronavirus E protein in lipid bilayers. *Biophys. J.* **91**, 938–947 (2006).
42. Wassenaar, T. A., Pluhackova, K., Böckmann, R. A., Marrink, S. J. & Tieleman, D. P. Going backward: A flexible geometric approach to reverse transformation from coarse grained to atomistic models. *J. Chem. Theory Comput.* **10**, 676–690 (2014).
43. Marrink, S. J. *et al.* Computational Modeling of Realistic Cell Membranes. *Chemical Reviews* vol. 119 6184–6226 (2019).
44. Corey, R. A., Vickery, O. N., Sansom, M. S. P. & Stansfeld, P. J. Insights into Membrane Protein-Lipid Interactions from Free Energy Calculations. *J. Chem. Theory Comput.* **15**, 5727–5736 (2019).
45. Pezeshkian, W. & Marrink, S. J. Simulating realistic membrane shapes. *Current Opinion in Cell Biology* vol. 71 103–111 (2021).
46. Periole, X., Cavalli, M., Marrink, S. J. & Ceruso, M. A. Combining an elastic network with a coarse-grained molecular force field: Structure, dynamics, and intermolecular recognition. *J. Chem. Theory Comput.* **5**, 2531–2543 (2009).
47. Javanainen, M., Martinez-Seara, H. & Vattulainen, I. Excessive aggregation of membrane proteins in the Martini model. *PLoS One* **12**, e0187936 (2017).
48. Boson, B. *et al.* The SARS-CoV-2 envelope and membrane proteins modulate maturation and retention of the spike protein, allowing assembly of virus-like particles. *J. Biol. Chem.* **296**, 100111 (2021).
49. Monje-Galvan, V. & Voth, G. A. Molecular interactions of the M and E integral membrane proteins of SARS-CoV-2. *bioRxiv* 2021.04.29.442018 (2021) doi:10.1101/2021.04.29.442018.
50. Westerbeck, J. W. & Machamer, C. E. A Coronavirus E Protein Is Present in Two Distinct Pools with Different Effects on Assembly and the Secretory Pathway. *J. Virol.* **89**, 9313–9323 (2015).
51. Baudoux, P., Carrat, C., Besnardeau, L., Charley, B. & Laude, H. Coronavirus Pseudoparticles Formed with Recombinant M and E Proteins Induce Alpha Interferon Synthesis by Leukocytes. *J. Virol.* **72**, 8636–8643 (1998).
52. de Haan, C. A. M., Vennema, H. & Rottier, P. J. M. Assembly of the Coronavirus Envelope: Homotypic Interactions between the M Proteins. *J. Virol.* **74**, 4967–4978 (2000).
53. Klumperman, J. *et al.* Coronavirus M proteins accumulate in the Golgi complex beyond the site of virion budding. *J. Virol.* **68**, 6523–6534 (1994).
54. Rosnoblet, C., Peanne, R., Legrand, D. & Foulquier, F. Glycosylation disorders of membrane trafficking. *Glycoconj. J.* **30**, 23–31 (2013).
55. Lim, K. P. & Liu, D. X. The missing link in coronavirus assembly. Retention of the avian coronavirus infectious bronchitis virus envelope protein in the pre-Golgi compartments and physical interaction between the envelope and membrane proteins. *J. Biol. Chem.* **276**, 17515–17523 (2001).
56. Denolly, S. *et al.* The amino-terminus of the hepatitis C virus (HCV) p7 viroporin and its cleavage from glycoprotein E2-p7 precursor determine specific infectivity and secretion



- levels of HCV particle types. *PLoS Pathog.* **13**, e1006774 (2017).
57. Li, Y., Boehning, D. F., Qian, T., Popov, V. L. & Weinman, S. A. Hepatitis C virus core protein increases mitochondrial ROS production by stimulation of Ca<sup>2+</sup> uniporter activity. *FASEB J.* **21**, 2474–2485 (2007).
  58. Sharon-Friling, R., Goodhouse, J., Colberg-Poley, A. M. & Shenk, T. Human cytomegalovirus pUL37x1 induces the release of endoplasmic reticulum calcium stores. *Proc. Natl. Acad. Sci. U. S. A.* **103**, 19117–19122 (2006).
  59. Kinoshita, S. *et al.* The T cell activation factor NF-ATc positively regulates HIV-1 replication and gene expression in T cells. *Immunity* **6**, 235–244 (1997).
  60. Bergqvist, A. & Rice, C. M. Transcriptional Activation of the Interleukin-2 Promoter by Hepatitis C Virus Core Protein. *J. Virol.* **75**, 772–781 (2001).
  61. Ding, W. *et al.* Human T-Cell Lymphotropic Virus Type 1 p12I Expression Increases Cytoplasmic Calcium To Enhance the Activation of Nuclear Factor of Activated T Cells. *J. Virol.* **76**, 10374–10382 (2002).
  62. Doedens, J. R. & Kirkegaard, K. Inhibition of cellular protein secretion by poliovirus proteins 2B and 3A. *EMBO J.* **14**, 894–907 (1995).
  63. Van Kuppeveld, F. J. M., De Jong, A. S., Melchers, W. J. G. & Willems, P. H. G. M. Enterovirus protein 2B po(u)res out the calcium: A viral strategy to survive? *Trends in Microbiology* vol. 13 41–44 (2005).
  64. Irurzun, A., Arroyo, J., Alvarez, A. & Carrasco, L. Enhanced intracellular calcium concentration during poliovirus infection. *J. Virol.* **69**, 5142–5146 (1995).
  65. Nieva, J. L., Agirre, A., Nir, S. & Carrasco, L. Mechanisms of membrane permeabilization by picornavirus 2B viroporin. in *FEBS Letters* vol. 552 68–73 (Elsevier, 2003).
  66. Berridge, M. J. The endoplasmic reticulum: A multifunctional signaling organelle. *Cell Calcium* (2002) doi:10.1016/S0143416002001823.
  67. Booth, C. & Koch, G. L. E. Perturbation of cellular calcium induces secretion of luminal ER proteins. *Cell* **59**, 729–737 (1989).
  68. Nigam, S. K. *et al.* A set of endoplasmic reticulum proteins possessing properties of molecular chaperones includes Ca<sup>2+</sup>-binding proteins and members of the thioredoxin superfamily. *J. Biol. Chem.* **269**, 1744–1749 (1994).
  69. D’Agostino, D. M., Bernardi, P., Chieco-Bianchi, L. & Ciminale, V. Mitochondria as functional targets of proteins coded by human tumor viruses. *Advances in Cancer Research* vol. 94 87–142 (2005).
  70. Pinton, P. *et al.* Reduced loading of intracellular Ca<sup>2+</sup> stores and downregulation of capacitative Ca<sup>2+</sup> influx in Bcl-2-overexpressing cells. *J. Cell Biol.* **148**, 857–862 (2000).
  71. McClenaghan, C., Hanson, A., Lee, S. J. & Nichols, C. G. Coronavirus Proteins as Ion Channels: Current and Potential Research. *Frontiers in Immunology* vol. 11 2651 (2020).
  72. Berridge, M. J., Bootman, M. D. & Roderick, H. L. Calcium signalling: Dynamics, homeostasis and remodelling. *Nature Reviews Molecular Cell Biology* (2003) doi:10.1038/nrm1155.
  73. Bootman, M. D. *et al.* Calcium signalling - An overview. *Semin. Cell Dev. Biol.* (2001) doi:10.1006/scdb.2000.0211.
  74. Cao, Y. *et al.* Computational Study of the Ion and Water Permeation and Transport Mechanisms of the SARS-CoV-2 Pentameric E Protein Channel. *Front. Mol. Biosci.* **7**, 565797 (2020).

75. Clarke, D. *et al.* Evidence for the formation of a heptameric ion channel complex by the hepatitis C virus P7 protein in vitro. *J. Biol. Chem.* **281**, 37057–37068 (2006).
76. Mehnert, T. *et al.* Biophysical characterization of Vpu from HIV-1 suggests a channel-pore dualism. *Proteins Struct. Funct. Genet.* **70**, 1488–1497 (2008).
77. Schubert, U. *et al.* Identification of an ion channel activity of the Vpu transmembrane domain and its involvement in the regulation of virus release from HIV-1-infected cells. *FEBS Lett.* **398**, 12–18 (1996).
78. Cui, F., Jernigan, R. & Wu, Z. Refinement of NMR-determined protein structures with database derived distance constraints. *J. Bioinform. Comput. Biol.* **3**, 1315–1329 (2005).
79. Gadhve, K. *et al.* Environmental dependence of the structure of the c-terminal domain of the SARS-CoV-2 envelope protein. *bioRxiv* (2020) doi:10.1101/2020.12.29.424646.
80. Borkotoky, S. & Banerjee, M. A computational prediction of SARS-CoV-2 structural protein inhibitors from *Azadirachta indica* (Neem). *J. Biomol. Struct. Dyn.* (2020) doi:10.1080/07391102.2020.1774419.
81. Gentile, D., Fuochi, V., Rescifina, A. & Furneri, P. M. New anti sars-cov-2 targets for quinoline derivatives chloroquine and hydroxychloroquine†. *Int. J. Mol. Sci.* **21**, 1–16 (2020).
82. Gupta, M. K. *et al.* In-silico approaches to detect inhibitors of the human severe acute respiratory syndrome coronavirus envelope protein ion channel. *J. Biomol. Struct. Dyn.* (2020) doi:10.1080/07391102.2020.1751300.
83. Kuzmin, A., Orekhov, P., Astashkin, R., Gordeliy, V. & Gushchin, I. Structure and dynamics of the SARS-CoV-2 envelope protein monomer 1 2. *bioRxiv* 2021.03.10.434722 (2021) doi:10.1101/2021.03.10.434722.
84. Yu, A. *et al.* A multiscale coarse-grained model of the SARS-CoV-2 virion. *Biophys. J.* **120**, 1097–1104 (2021).
85. Bac-to-Bac™ Baculovirus Expression System. <https://www.thermofisher.com/order/catalog/product/10359016#/10359016>.
86. Schindelin, J. *et al.* Fiji: An open-source platform for biological-image analysis. *Nature Methods* vol. 9 676–682 (2012).
87. Vriens, J. *et al.* TRPM3 Is a Nociceptor Channel Involved in the Detection of Noxious Heat. *Neuron* **70**, 482–494 (2011).
88. Wagner, T. F. J. *et al.* Transient receptor potential M3 channels are ionotropic steroid receptors in pancreatic  $\beta$  cells. *Nat. Cell Biol.* **10**, 1421–1430 (2008).
89. Páll, S. *et al.* Heterogeneous parallelization and acceleration of molecular dynamics simulations in GROMACS. *J. Chem. Phys.* **153**, (2020).
90. Jo, S., Kim, T., Iyer, V. G. & Im, W. CHARMM-GUI: A web-based graphical user interface for CHARMM. *J. Comput. Chem.* **29**, 1859–1865 (2008).
91. Bussi, G., Donadio, D. & Parrinello, M. Canonical sampling through velocity rescaling. *J. Chem. Phys.* **126**, (2007).
92. Parrinello, M. & Rahman, A. Polymorphic transitions in single crystals: A new molecular dynamics method. *J. Appl. Phys.* **52**, 7182–7190 (1981).
93. Bhatia, H., Ingólfsson, H. I., Carpenter, T. S., Lightstone, F. C. & Bremer, P. T. MemSurfer: A Tool for Robust Computation and Characterization of Curved Membranes. *J. Chem. Theory Comput.* **15**, 6411–6421 (2019).
94. Allen, M., Poggiali, D., Whitaker, K., Marshall, T. R. & Kievit, R. A. Raincloud plots: A multi-platform tool for robust data visualization [version 1; peer review: 2 approved].

- Wellcome Open Res.* **4**, (2019).
95. Virtanen, P. *et al.* SciPy 1.0: fundamental algorithms for scientific computing in Python. *Nat. Methods* **17**, 261–272 (2020).
  96. Humphrey, W., Dalke, A. & Schulten, K. VMD: Visual molecular dynamics. *J. Mol. Graph.* **14**, 33–38 (1996).
  97. Jo, S. *et al.* CHARMM-GUI 10 years for biomolecular modeling and simulation. *Journal of Computational Chemistry* vol. 38 1114–1124 (2017).
  98. Jämbeck, J. P. M. & Lyubartsev, A. P. An extension and further validation of an all-atomistic force field for biological membranes. *J. Chem. Theory Comput.* **8**, 2938–2948 (2012).
  99. Jämbeck, J. P. M. & Lyubartsev, A. P. Another piece of the membrane puzzle: Extending lipids further. *J. Chem. Theory Comput.* **9**, 774–784 (2013).
  100. Maier, J. A. *et al.* ff14SB: Improving the Accuracy of Protein Side Chain and Backbone Parameters from ff99SB. *J. Chem. Theory Comput.* **11**, 3696–3713 (2015).
  101. Hess, B. P-LINCS: A Parallel Linear Constraint Solver for Molecular Simulation. *J. Chem. Theory Comput.* **4**, 116–22 (2008).
  102. Jorgensen, W. L., Chandrasekhar, J., Madura, J. D., Impey, R. W. & Klein, M. L. Comparison of simple potential functions for simulating liquid water. *J. Chem. Phys.* **79**, 926–935 (1983).
  103. Miyamoto, S. & Kollman, P. A. Settle: An analytical version of the SHAKE and RATTLE algorithm for rigid water models. *J. Comput. Chem.* **13**, 952–962 (1992).
  104. Essmann, U. *et al.* A smooth particle mesh Ewald method. *J. Chem. Phys.* **103**, 8577–8593 (1995).
  105. Gowers, R. *et al.* MDAnalysis: A Python Package for the Rapid Analysis of Molecular Dynamics Simulations. in *Proceedings of the 15th Python in Science Conference* 98–105 (SciPy, 2016). doi:10.25080/majora-629e541a-00e.
  106. Waterhouse, A. *et al.* SWISS-MODEL: Homology modelling of protein structures and complexes. *Nucleic Acids Res.* **46**, W296–W303 (2018).
  107. Lill, M. A. & Danielson, M. L. Computer-aided drug design platform using PyMOL. *J. Comput. Aided. Mol. Des.* **25**, 13–19 (2011).
  108. Ruch, T. R. & Machamer, C. E. The coronavirus E protein: Assembly and beyond. *Viruses* vol. 4 363–382 (2012).
  109. Lindahl, V., Lidmar, J. & Hess, B. Accelerated weight histogram method for exploring free energy landscapes. *J. Chem. Phys.* **141**, (2014).

## Figures

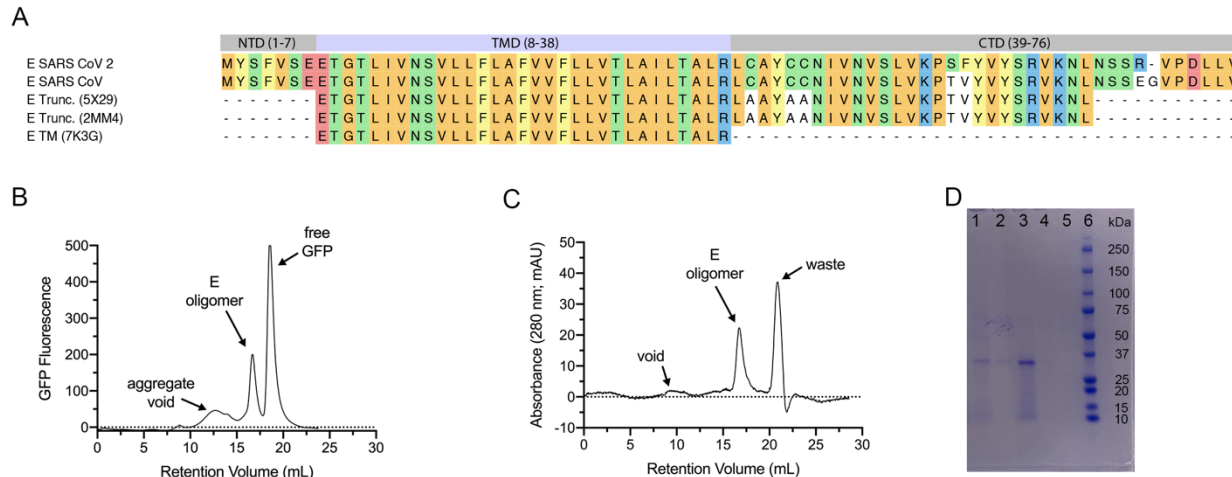

### Figure 1. Sequence and oligomerization of SARS-CoV-2 E protein

**A:** Protein sequence alignment using clustal omega. Sequences (from top to bottom): E protein of SARS-CoV-2; E protein of SARS-CoV; E (SARS-CoV) truncation used for NMR structure (PDB ID: 5X29); E (SARS-CoV) truncation used for NMR structure (PDB ID: 2MM4); E (SARS-CoV-2) transmembrane domain used for NMR structure (PDB ID: 7K3G). Domains of E SARS-CoV-2 are annotated above its sequence, illustrating the amino-terminal domain (NTD, residues 1-7), transmembrane domain (TMD, residues 8-38), and carboxy-terminal domain (CTD, residues 39-75). Colored residues match E SARS-CoV-2 reference sequence; mismatches are not colored. **B:** Chromatogram result from FSEC on Superose 6 10/300 column where y-axis represents GFP fluorescence and x-axis represents retention volume (mL). Corresponding fractions are estimated by arrows. **C:** Chromatogram result from SEC on Superdex 200 10/300 Increase where y-axis represents UV absorbance (280 nm) and x-axis represents retention volume (mL). Corresponding fractions are estimated by arrows. **D:** SDS-PAGE loaded with coomassie-stained samples from SEC purification under reducing conditions. Lane 1: SEC load (diluted 1:2); 2: E oligomer fraction ( $V_R = 16.8$  mL); 3: concentrated E oligomer fraction; 4: waste fraction ( $V_R = 20.9$  mL); 5: concentrated waste fraction; 6: marker with corresponding mass denoted to the right of the band (kDa).

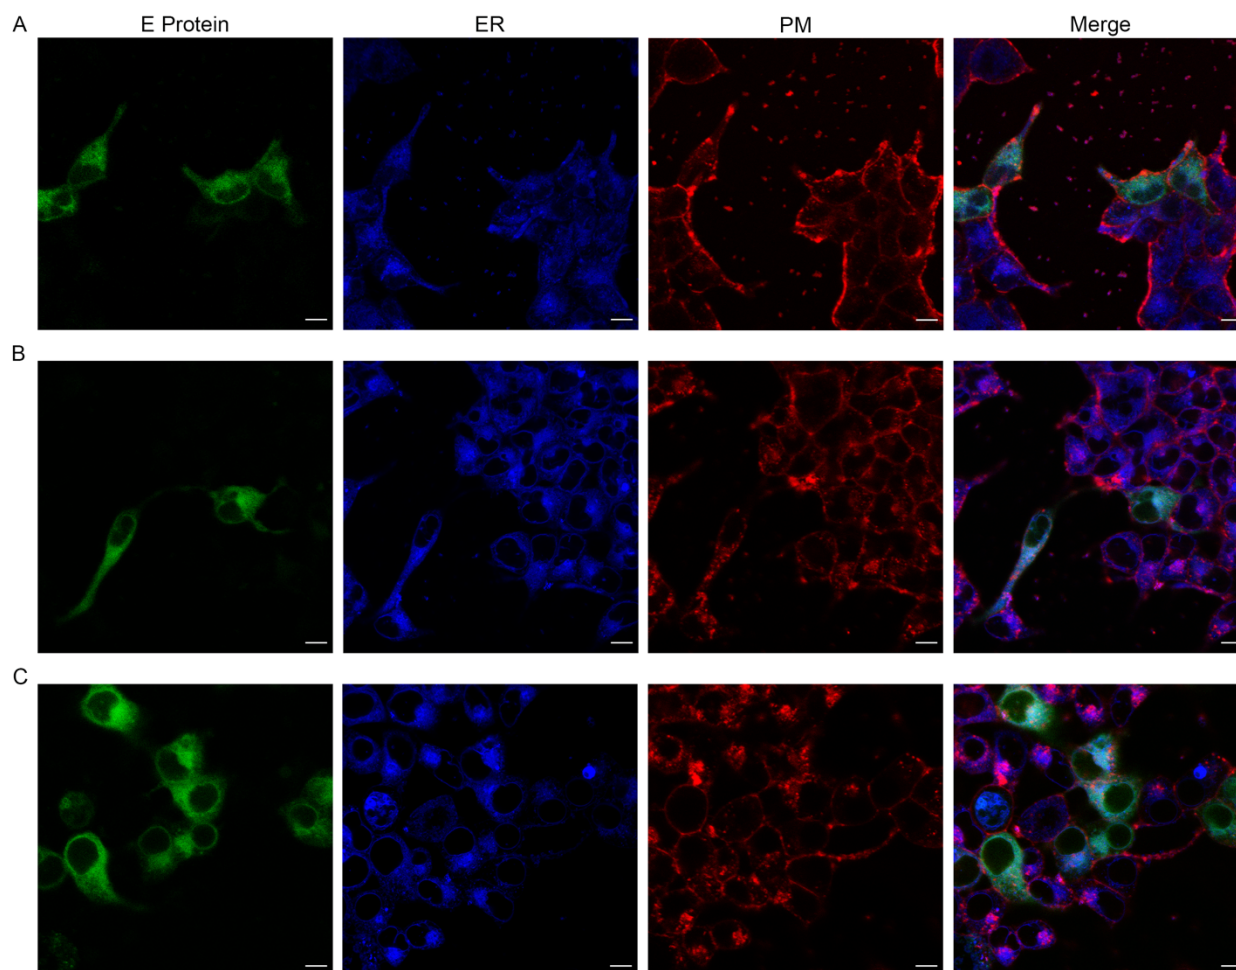

**Figure 2. E protein localizes intracellularly in HEK293T cells.**

Live-cell confocal microscopy shows the E protein localizing to intracellular compartments. A: E protein with a C-terminal EGFP fusion. B: E protein with a N-terminal export signal sequence from the  $\alpha 7$  subunit of nAChR and C-terminal EGFP fusion. C: E protein containing point mutation P54A with a C-terminal EGFP fusion. HEK293T cells were transiently transfected with the respective constructs and imaged 24 hpt (1<sup>st</sup> column, E protein, green signal). Cells were also loaded with an ER-Tracker<sup>TM</sup> to visualize the ER compartment (2<sup>nd</sup> column, ER, blue signal). Cells were also loaded with PM probe (see Methods) (3<sup>rd</sup> column, PM, red signal) to visualize the PM. 4<sup>th</sup> column represents merged signals. Scale bars represent 10  $\mu$ m.



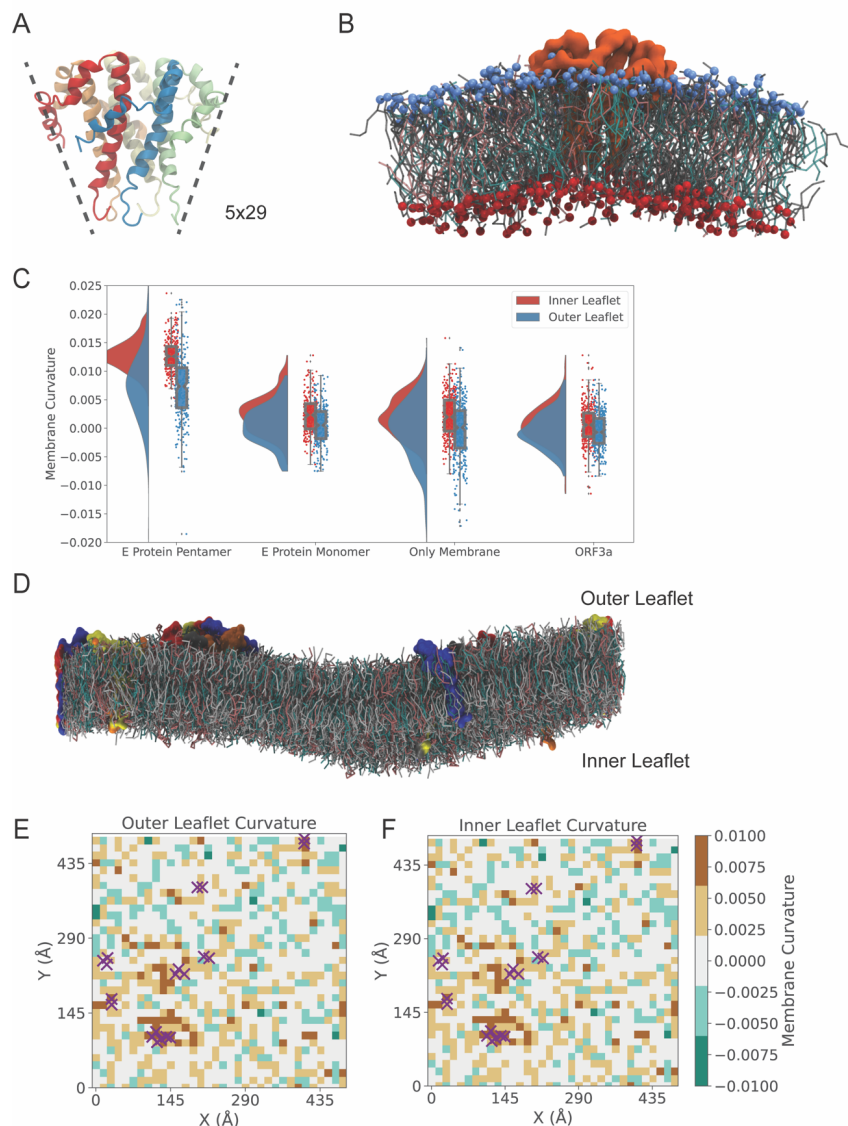

### Figure 3. E protein induces membrane curvature in coarse-grained simulations

A: Model of the E protein, represented by the cone-shaped pentameric solution-phase NMR structure covering residues E8–L81 of the SARS-CoV variant (PDB ID: 5X29). B: Final snapshot of the CG system with the E-protein pentamer embedded in a mixed lipid bilayer. For clarity, only lipids within 50 Å from the protein were displayed. C: The mean membrane curvature within 25 Å of the protein for both outer and inner leaflets, with probability distribution on the left, and raw data ( $N = 500$  samples) with box plots indicating the median, interquartile range (25<sup>th</sup>–75<sup>th</sup> percentiles) and minimum–maximum ranges on the right. The E-protein pentamer induced a positive bending of the membrane around it while the membrane curvature of the E-protein monomer, ORF3a protein, or pure membrane patch remained planar. D: Final snapshot of the system with 20 E-protein monomers. While the monomers did not form a symmetric pentamer, the major aggregated cluster of monomers did bend the local membrane. Proteins are shown in surface representation, with lipids as sticks (gray: DOPC, cyan: DOPE, pink: DOPS) E-F: Outer- and inner-leaflet curvature of the last snapshot of the system containing 20 E-protein monomers. The membrane around the major protein cluster displayed the highest local curvature. The positions of protein monomers are indicated by purple crosses.



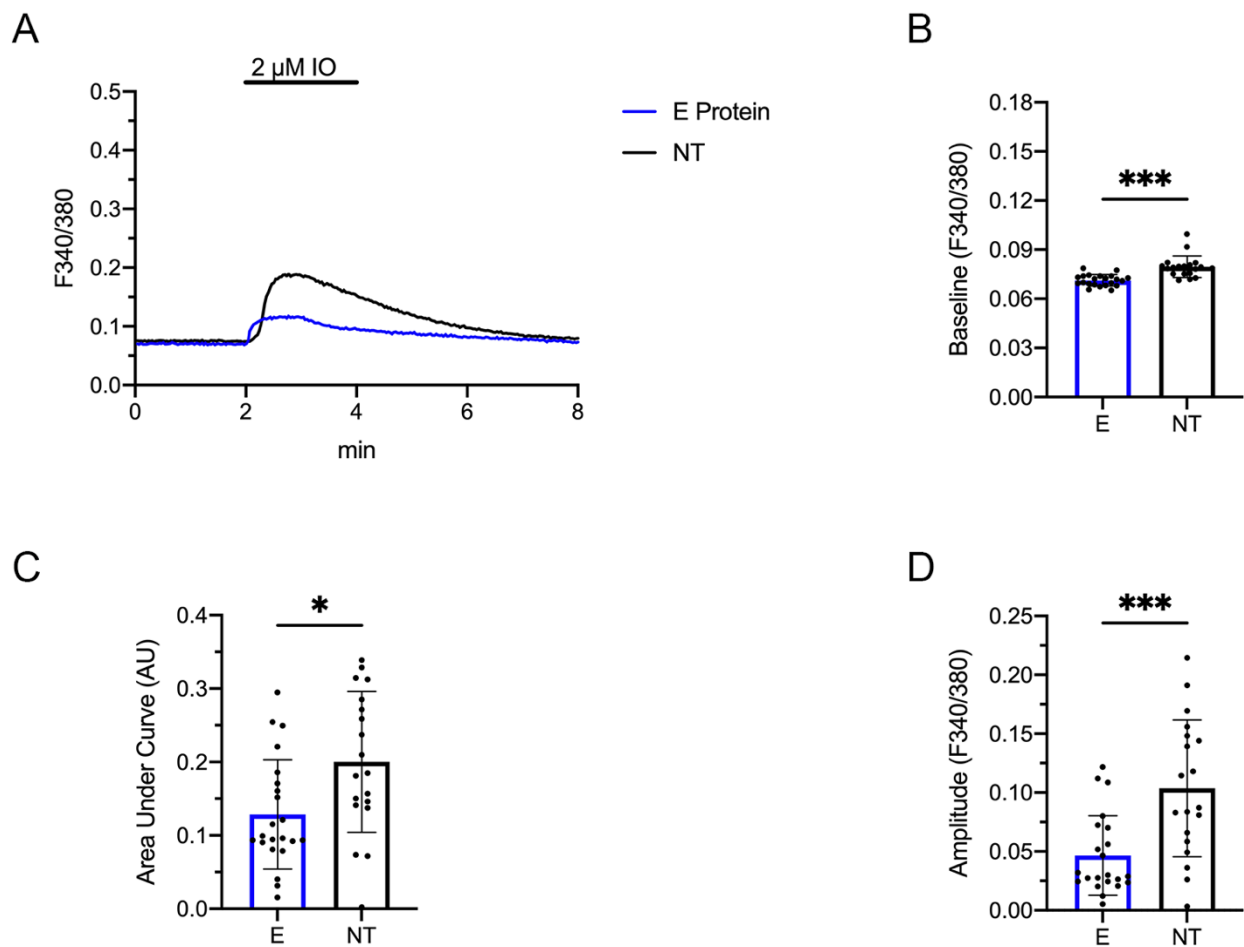

**Figure 4.  $Ca^{2+}$ -store content is diminished after transfection with E protein.**

A-B: Representative  $[Ca^{2+}]_{ER}$  measurements in HEK293T cells transfected with the EcGFP construct (A, blue trace) and non-transfected (NT) cells (A, black trace). Recordings were performed in  $Ca^{2+}$ -free media. 2  $\mu$ M ionomycin (IO) added after 2 minutes. B-D: Quantification of parameters to evaluate  $Ca^{2+}$  store content release. E protein: N = 22; NT: N = 19. B: Baseline,  $p < 0.001$ (\*\*\*). C Area under Curve (AUC),  $p = 0.01$ (\*). D: Amplitude,  $p < 0.001$ (\*\*\*). Statistical significance was calculated using Welch's unpaired t-test to account for unequal standard deviations.

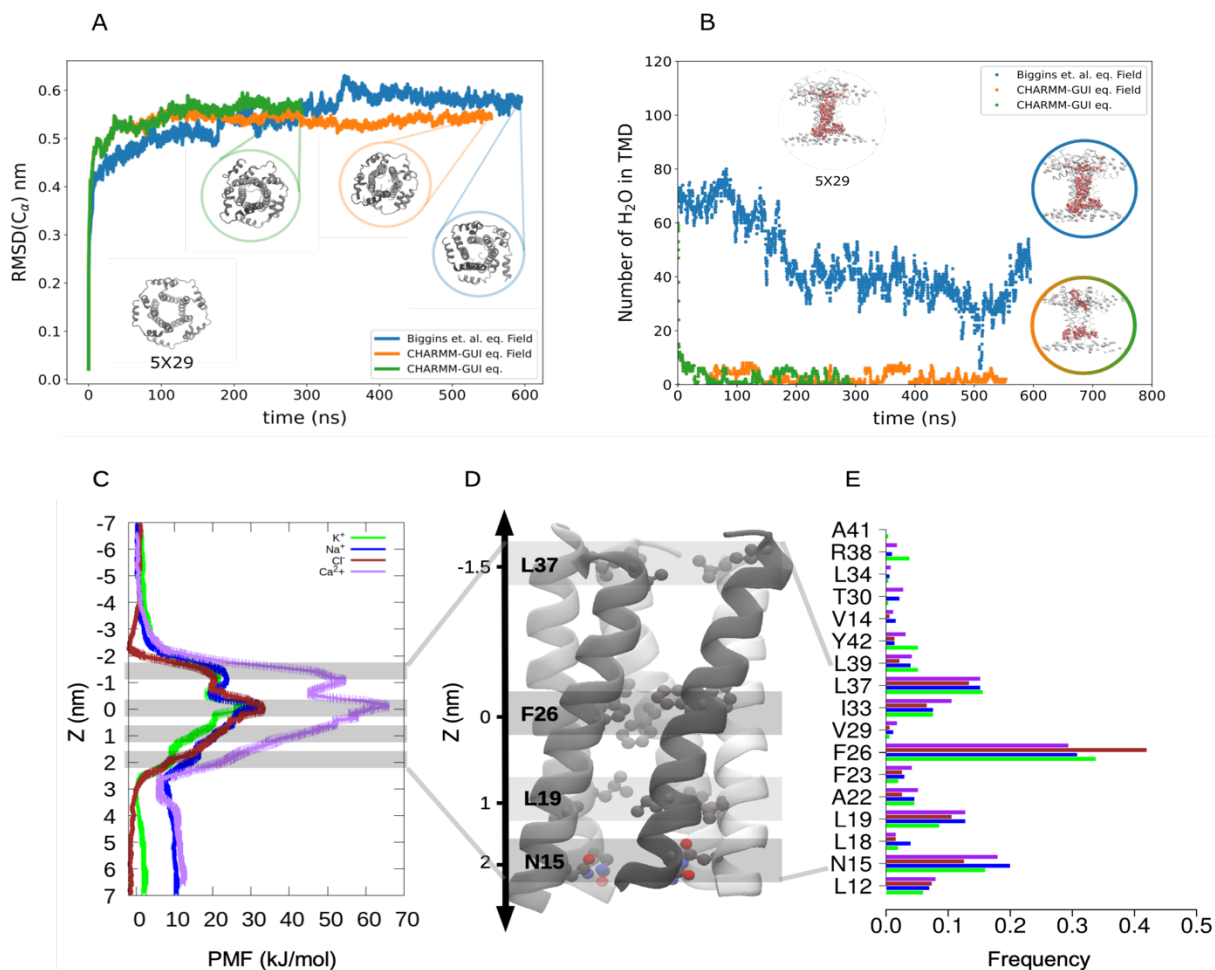

### Figure 5. Limited stability and permeation in NMR-based models.

A: Root mean-squared deviations (RMSDs) of Ca atoms as a function of time during the three most stable simulations of E-protein models based on the pentameric solution-NMR structure (PDB ID: 5X29). Models were equilibrated using the standard CHARMM-GUI protocol and simulated in the absence (green) or presence (orange) of an electric field, or using a pentagonal pore-restrained protocol<sup>38</sup> and simulated with a field (blue). Inset snapshot at lower left shows the starting model, viewed from the C-terminal side perpendicular to the membrane; additional insets show snapshots from the end of the three simulations. B: Number of water molecules in the TMD as a function of time during the three simulations shown in A. Inset at top left shows the starting model, viewed from the membrane plane; additional insets show representative snapshots from the end of each simulation. C: Free-energy profiles (mean  $\pm$  standard deviation) for permeant ions ( $\text{Cl}^-$ , orange;  $\text{Na}^+$ , blue;  $\text{K}^+$ , green;  $\text{Ca}^{2+}$ , purple) along the channel axis of the most stable simulation endpoint in A–B. The Z-axis is centered with the highest barrier, proximal to F26 at the channel midpoint, at 0 nm. D: 3D structure highlighting residues in relatively high contact with permeant ions (N15, L19, F26, L37). E: Histogram showing contact frequencies for transmembrane-helix residues in contact with  $\text{Cl}^-$ ,  $\text{Na}^+$ ,  $\text{K}^+$  and  $\text{Ca}^{2+}$  in orange, cyan, green and purple, respectively.
